# Supplementary material for: Tumor Lymphocyte Infiltration Is Correlated with a Favorable Tumor Regression Grade after Neoadjuvant Treatment for Esophageal Adenocarcinoma
Source: MDPI journal article supplement (doi:10.3390/jpm12040627), 2022-04-13
Supplement: s1 [file s1]

**Table S1.** (Supplementary): The density of comparison markers in benign versus malignant stroma and tumors.

| <b>TIL</b> | <b>Stroma<br/>Malignant</b> | <b>Stroma<br/>Adjacent</b> | <b>P value</b> | <b>Tumor<br/>Malignant</b> | <b>Tumor<br/>Adjacent</b> | <b>P value</b> |
|------------|-----------------------------|----------------------------|----------------|----------------------------|---------------------------|----------------|
| CD3        | 21.2±16.1                   | 21.8±16.6                  | 0.97           | 8.3±9.6                    | 6.7±10.3                  | 0.41           |
| CD20       | 4.6±5.4                     | 3.6±4.1                    | 0.29           | 1.3±2.5                    | 1.1±2.0                   | 0.7            |
| CD8        | 15.1±15.7                   | 12.3±11.3                  | 0.3            | 11.3±17.0                  | 5.4±7.6                   | 0.03           |
| CD4        | 8.7±8.1                     | 12.1±8.2                   | 0.034          | 4.9±6.6                    | 3.0±4.6                   | 0.13           |
| CD45RO     | 13.4±10.3                   | 15.8±7.6                   | 0.16           | 4.3±4.7                    | 6.0±5.6                   | 0.09           |
| FOXP3      | 2.8±3.3                     | 3.0±3.4                    | 0.76           | 2.2±2.0                    | 2.0±3.1                   | 0.69           |
| CD68       | 20.4±15.0                   | 17.9±8.7                   | 0.39           | 7.4±4.7                    | 6.2±10.8                  | 0.59           |
| CD163      | 22.7±19.5                   | 20.8±6.7                   | 0.57           | 6.2±5.8                    | 5.7±10.6                  | 0.84           |

TIL, tumor infiltrating lymphocytes.

**Table S2.** (Supplementary): Quantification of tumor infiltrating lymphocytes in the tumor microenvironment in the different patient groups.

| All Cohort        |                                    |                            |                                                          |                                                    |                                                            |                                                           |         |
|-------------------|------------------------------------|----------------------------|----------------------------------------------------------|----------------------------------------------------|------------------------------------------------------------|-----------------------------------------------------------|---------|
| TIL               | (N=43)<br>% post cell<br>(Mean±SD) | % post<br>cell<br>(Median) | Chemo<br>only<br>(N=28)<br>% patients<br>low vs.<br>high | Surgery only<br>(N=15)<br>% post cell<br>(Mean±SD) | Good Re-<br>sponder<br>(N=13)<br>% post cells<br>(Mean±SD) | Bad Re-<br>sponder<br>(N=15)<br>% post cells<br>(Mean±SD) | P value |
| CD3-Stroma        | 17.5±15.1                          | 13                         | 45 : 55                                                  | 18.2±18.4                                          | 30.2±10.5                                                  | 9.1±4.9                                                   | 0.003   |
| CD3-Tumor         | 6.3±7.9                            | 2                          | 9 : 91                                                   | 4.3±6.7                                            | 15.3±8.8                                                   | 2.5±1.6                                                   | 0.001   |
| CD20-Stroma       | 3.4±3.9                            | 2                          | 50 : 50                                                  | 3.9±4.7                                            | 3.9±3.4                                                    | 2.5±3.4                                                   | 0.63    |
| CD20-Tumor        | 1.1±2.1                            | 1                          | 46 : 54                                                  | 0.9±0.7                                            | 1.2±0.7                                                    | 1.2±2.9                                                   | 0.91    |
| CD8-Stroma        | 11.1±11.1                          | 8.5                        | 30 : 70                                                  | 12.1±15.5                                          | 16.6±3.6                                                   | 7.1±6.7                                                   | 0.13    |
| CD8-Tumor         | 6.4±10.1                           | 2.0                        | 44 : 56                                                  | 2.6±2.4                                            | 20.6±14.8                                                  | 2.6±2.7                                                   | 0.001   |
| CD4-Stroma        | 8.7±7.4                            | 6.5                        | 52 : 48                                                  | 7.9±5.9                                            | 15.3±6.3                                                   | 6.1±7.7                                                   | 0.013   |
| CD4-Tumor         | 3.0±4.3                            | 1.5                        | 48 : 52                                                  | 2.1±3.8                                            | 6.6±6.1                                                    | 1.8±2.2                                                   | 0.004   |
| CD45R0-<br>Stroma | 11.9±8.2                           | 10                         | 39 : 61                                                  | 11.6±6.6                                           | 16.9±7.5                                                   | 9.5±9.2                                                   | 0.11    |
| CD45R0-<br>Tumor  | 3.8±4.2                            | 2                          | 31 : 69                                                  | 1.8±1.4                                            | 8.5±4.7                                                    | 3.4±4.2                                                   | 0.001   |
| Foxp3-Stroma      | 2.4±2.7                            | 1                          | 42 : 58                                                  | 2.1±1.6                                            | 3.9±4.7                                                    | 2.0±2.2                                                   | 0.3     |
| Foxp3-Tumor       | 1.7±2                              | 1                          | 30 : 70                                                  | 1.2±1.5                                            | 3.4±3.0                                                    | 1.4±1.2                                                   | 0.03    |
| CD68-Stroma       | 16.0±9.9                           | 14                         | 41 : 59                                                  | 15.2±8.2                                           | 15.6±15.6                                                  | 17.3±7.1                                                  | 0.85    |
| CD68-Tumor        | 5.9±5.8                            | 4                          | 41 : 59                                                  | 4.8±2.5                                            | 4.8±3.3                                                    | 7.9±9.0                                                   | 0.33    |
| CD163-Stroma      | 18.0±11.6                          | 15                         | 36 : 64                                                  | 17.8±12.5                                          | 18.6±13.4                                                  | 17.8±9.9                                                  | 0.99    |
| CD163-Tumor       | 4.7±5.5                            | 3                          | 27 : 73                                                  | 3.4±3.6                                            | 5.4±4.7                                                    | 5.7±7.6                                                   | 0.51    |

TIL, tumor infiltrating lymphocytes; Post, positive.

**Table S3.** Quantification of tumor infiltrating lymphocytes in the tumor microenvironment of chemotherapy treated groups.

|        | Area   | Good Responders<br>(N=13) | Bad<br>Responders<br>(N=15) | P Value |
|--------|--------|---------------------------|-----------------------------|---------|
| CD3    | Stroma | 30.2±10.5                 | 9.1±4.9                     | 0.001   |
|        | Tumor  | 15.3±8.8                  | 2.5±1.6                     | 0.001   |
| CD20   | Stroma | 3.9±3.4                   | 2.5±3.4                     | 0.37    |
|        | Tumor  | 1.2±0.66                  | 1.2±2.8                     | 0.99    |
| CD8    | Stroma | 16.6±3.6                  | 7.1±6.7                     | 0.001   |
|        | Tumor  | 20.6±14.8                 | 2.6±2.8                     | 0.001   |
| CD4    | Stroma | 15.3±6.3                  | 6.1±7.7                     | 0.009   |
|        | Tumor  | 7.3±5.8                   | 1.8±2.2                     | 0.004   |
| CD45R0 | Stroma | 16.9±7.5                  | 9.5±9.2                     | 0.066   |
|        | Tumor  | 8.5±4.7                   | 3.4±4.2                     | 0.014   |
| FOXP3  | Stroma | 3.9±4.7                   | 2.0±2.2                     | 0.24    |
|        | Tumor  | 3.4±3.0                   | 1.4±1.2                     | 0.04    |
| CD68   | Stroma | 15.6±15.6                 | 17.3±7.1                    | 0.72    |
|        | Tumor  | 4.8±3.3                   | 7.9±9.0                     | 0.34    |
| CD163  | Stroma | 18.6±13.4                 | 17.8±9.9                    | 0.87    |
|        | Tumor  | 5.4±4.7                   | 5.7±7.6                     | 0.93    |

**Table S4.** (Supplementary): Quantification of tumor infiltrating lymphocytes by lymph node involvement / staging in chemotherapy treated groups.

|        | Area   | LN-N0<br>(N=13) | LN-N+<br>(N=15) | P value | Stage I<br>(N=10) | Stage II<br>(N=3) | Stage III<br>I (N=15) | P value |
|--------|--------|-----------------|-----------------|---------|-------------------|-------------------|-----------------------|---------|
| CD3    | Stroma | 28.5±11.5       | 8.8±4.9         | 0.001   | 33.1±9.4          | 17.7±7.2          | 8.8±4.9               | 0.001   |
|        | Tumor  | 14.5±8.7        | 2.1±0.8         | 0.001   | 16.7±9.6          | 9.3±2.5           | 2.1±0.8               | 0.001   |
| CD8    | Stroma | 15.9±4.0        | 6.9±6.9         | 0.002   | 16.6±3.9          | 13.5±4.9          | 6.9±6.9               | 0.008   |
|        | Tumor  | 19.0±14.7       | 2.4±2.7         | 0.001   | 18.9±15.0         | 19.5±19.1         | 2.4±2.7               | 0.002   |
| CD4    | Stroma | 17.0±7.9        | 4.4±3.6         | 0.001   | 14.7±6.7          | 25±8.45           | 4.4±3.6               | 0.001   |
|        | Tumor  | 7.0±5.5         | 1.6±2.1         | 0.003   | 7.4±6.2           | 5.5±0.7           | 1.6±2.1               | 0.01    |
| CD45R0 | Stroma | 19.2±9.9        | 7.4±4.9         | 0.001   | 16.7±8.1          | 28.0±14.1         | 7.4±5.0               | 0.001   |
|        | Tumor  | 9.2±4.9         | 2.6±2.8         | 0.001   | 8.4±5.0           | 12±4.2            | 2.6±2.8               | 0.001   |

LN-N0: lymph node without metastases, LN-N1 – lymph node with metastases.

**Table S5.** The relationship between tumor infiltrating lymphocyte subpopulations enrichment and disease free and overall survival.

|               | DFS                                      |                                           |         | OS                                       |                                           |         |
|---------------|------------------------------------------|-------------------------------------------|---------|------------------------------------------|-------------------------------------------|---------|
|               | Low Enrichment<br>Mean (95%CI)<br>months | High Enrichment<br>Mean (95%CI)<br>months | P value | Low Enrichment<br>Mean (95%CI)<br>months | High Enrichment<br>Mean (95%CI)<br>months | P value |
| CD3 Stroma    | 9.5<br>(5.3:13.7)                        | 58.0<br>(33.3:82.8)                       | 0.001   | 19.6<br>(15.1:24.0)                      | 59.0<br>(39.0:79.0)                       | 0.001   |
| CD3 Tumor     | 5.0<br>(0:12.8)                          | 38.1 (20.2:55.9)                          | 0.074   | 14.5<br>(7.6:21.4)                       | 43.8<br>(29.1:58.4)                       | 0.021   |
| CD8 Stroma    | 18.9<br>(14.2:23.6)                      | 59.7 (39.1:80.3)                          | 0.001   | 20.3<br>(16.2:24.5)                      | 67.2<br>(42.5:91.9)                       | 0.001   |
| CD8 Tumor     | 9.3<br>(5.0:13.7)                        | 43.3 (21.5:65.0)                          | 0.077   | 18.9<br>(15.5:22.2)                      | 54.3<br>(35.0:73.5)                       | 0.002   |
| CD4 Stroma    | 13.9<br>(2.6:25.2)                       | 51.5<br>(25.8:77.2)                       | 0.047   | 23.6<br>(13.9:33.4)                      | 60.5<br>(39.1:81.8)                       | 0.005   |
| CD4 Tumor     | 15.7 (4.3:27.0)                          | 47.0 (21.0:73.0)                          | 0.096   | 28.0<br>(16.4:36.3)                      | 53.4<br>(31.8:75.0)                       | 0.11    |
| CD45R0 Stroma | 16.9 (2.1:31.6)                          | 41.0<br>(18.6:63.4)                       | 0.35    | 27.4<br>(15.5:39.3)                      | 50.4<br>(30.8:70.1)                       | 0.12    |
| CD45R0 Tumor  | 8.3 (3.5:13.1)                           | 43.7 (22.1:65.3)                          | 0.021   | 17.7<br>(12.7:22.7)                      | 52.8<br>(33.3:72.3)                       | 0.003   |

DFS, disease free survival; OS, overall survival.
